# Supplementary material
Source: Springer Nature journal article supplement (https://www.springermedizin.de/resource/supplementary/12985_2008_533_MOESM2_ESM.pdf/9608306)
Supplement: MOESM2 [file 9608306]

HSV-1-UL31 ---MYDIAPRRSGSRPGPGRDKTRRR-----SRFSAAGNPGVERRASRKSPLSHARRLELCL-----  
DEV-UL31 MSDYDTTTHSSARRRRSSSFQPMR-----ARSSGSNVPYWRPYSRRRSLMRPSSQRG-----  
EBV-BFLF2 ---MAPVTPDAVNAHQORPADPALRRLMHPHRRNYTASKASAHSVKSVSRCGKSRSELGRMERVGSVARSICSRHTR  
HCMV-UL53 ---MSSVSGVRTPRERRSALRSLLRK-----RRQRELASKVASTVNGATSANNHGEPSS-----

HSV-1-UL31 HERRR----YRGFFAALAQTPESEEIAIVRSLSVPLVKTTVPVSLPFSLDQTVADNCLTSLSGMGYYLGIGGCCPACS-A  
DEV-UL31 ETVER----YRRFFEMISRSPSDELAIVRELNVPLIKSTTVVLPFDLDMADVADNCLSLSGMGYQLGIGGCCPVCSSS  
EBV-BFLF2 HGVDRSHFSLRDFFRGISANFELGKDFLREMNTPIHVSEAVFLPLSLCTLSPGRCLRLSPFGHSLTLGSHCEICINR  
HCMV-UL53 PADARPRLTLDLHLDIFREHPELELKYLNMMKMAITGKESICLPFNHFSHRQHTCLDISPYGNEQVSRIACTSCE---

HSV-1-UL31 GDGRLATVSREALILAFVQQINTIFEHRTFLASLVVLADRRHS--T-PLQDLLADTLGQPELFFVHTILRGGG  
DEV-UL31 :GEPRLNRIIDRSTLILAYVQQVNHLVQYRTFLASIQAAASDRISDDASETENILACISQQPEFFFAYYVLREAG  
EBV-BFLF2 :SQVHVP-QEFSSTQLSFFNNVHKIIPNKTFYVSLSSSP-----SAVKAGLSQPSLLYAYLVT--GH  
HCMV-UL53 :DNRILP--TASDAMVAFINQTSNIMKNRNFYFGCKSSE-----LLKLSTNQPPIFQIYYLL---H

HSV-1-UL31 ACDPRFLFYDPPTYGGHMLYVIFPGTSAHLHYRLIDRMLT-ACPGYRFAAHVWQSTFVLVVRRNAEKPAD  
DEV-UL31 MRDIRVLFYRDVDEGGYVMIYIPFTGNAVHLHYRLIDCLKS-ACRGYRLMAHVWHSTFVLVVRDRDRERQTDV  
EBV-BFLF2 FCGTICPIFSTNGKGRLLIMHLLLQGTSLHIPETCLKLLCENIGPTYELAVDLVGDAFCIKVS--P-RDVTY  
HCMV-UL53 AANHDIVPFMAENGRLLMHVIFENSVDVHIPCDCITQMLTAAREDYSVTLNIVRDHVVISVL---CHAVS

HSV-1-UL31 E-IPTVSAADIYCKMRDISFDGGLMLEYQRLYATFDEFPPP-----  
DEV-UL31 DSVFQISIEDIYCKMCDLNFDEGELLLEYRKYAAAFDDFPPP-----  
EBV-BFLF2 EKAVNVDEDAIYEAIKDLECGDELRLQIINYTQLILENKQ-----  
HCMV-UL53 :ASSVKIDVTILQRKIDEMDIPNDVSESFERYKELIQELCQSSGNNLYEATSSYAIRSPLTASPLHVSTNGCGPSSSSQ

HSV-1-UL31 -----  
DEV-UL31 -----  
EBV-BFLF2 -----  
HCMV-UL53 STPPHLHPPSQATQPHHYSHHQSSQSQHHHRPQSPPPPFLNSIRAP
